# Supplementary material
Source: PubMed Central journal article supplement (PMC6929389)
Supplement: baADV2019001062-suppl1.pdf [file baADV2019001062-suppl1.pdf]

Supplemental Figure 1: 60\* PCNSL patients without a pre-existing disorder

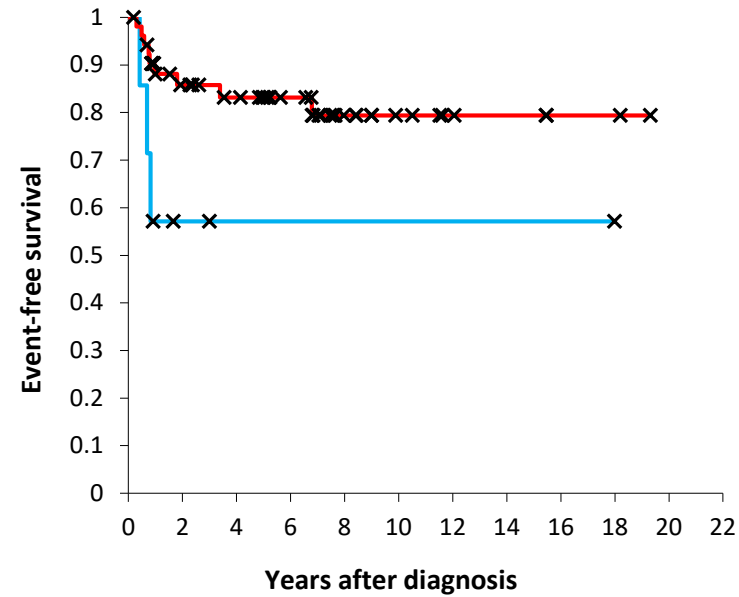

— Pediatric NHL-type therapy (n=53): 5-year EFS: 83%±5%  
— Miscellaneous therapy (n=7): 5-year EFS: 57%±19%  
p=0.044

\*one pt. was excluded as therapy was not started for 3 months due to logistic reasons.

**Supplemental Table 1: Initial characteristics of the 75 PCNSL study patients**

| Pt. No. | Age (y) | Lansky         | Gender | pre-existing disorder  | Time to diagnosis | B-Symptoms | Cranial nerve palsies | Histology        | LDH level | Intracranial mass(es) | Intraspinal mass(es) | CSF only | Number of lesions |
|---------|---------|----------------|--------|------------------------|-------------------|------------|-----------------------|------------------|-----------|-----------------------|----------------------|----------|-------------------|
| 1       | 3.59    | ≥80%           | male   | /                      | 11 weeks          | no         | no                    | DLBCL            | ≥500 U/l  | yes                   | no                   | no       | 1 lesion          |
| 2       | 4.32    | ≥80%           | male   | /                      | 2 weeks           | no         | yes                   | ALCL             | ≥500 U/l  | yes                   | no                   | no       | 1 lesion          |
| 3       | 18.87   | not applicable | male   | /                      | 8 weeks           | no         | no                    | DLBCL            | <500 U/l  | yes                   | no                   | no       | 1 lesion          |
| 4       | 7.41    | <20%           | male   | HIV infection          | 3 weeks           | no         | unknown               | DLBCL            | ≥500 U/l  | yes                   | no                   | no       | ≥2 lesions        |
| 5       | 9.20    | 60-79%         | male   | /                      | 12 weeks          | no         | no                    | DLBCL            | <500 U/l  | yes                   | no                   | no       | 1 lesion          |
| 6       | 12.53   | 60-79%         | female | /                      | 40 weeks          | yes        | yes                   | DLBCL            | <500 U/l  | yes                   | no                   | no       | ≥2 lesions        |
| 7       | 4.19    | 40-59%         | male   | /                      | 1 week            | no         | yes                   | Burkitt lymphoma | <500 U/l  | yes                   | no                   | no       | ≥2 lesions        |
| 8       | 12.12   | ≥80%           | male   | /                      | 2 weeks           | no         | yes                   | Burkitt lymphoma | <500 U/l  | yes                   | no                   | no       | 1 lesion          |
| 9       | 17.00   | ≥80%           | male   | /                      | 4 weeks           | no         | no                    | DLBCL            | ≥500 U/l  | yes                   | no                   | no       | ≥2 lesions        |
| 10      | 13.26   | 20-39%         | female | /                      | 4 weeks           | no         | yes                   | DLBCL            | <500 U/l  | yes                   | no                   | no       | 1 lesion          |
| 11      | 13.51   | 20-39%         | female | /                      | 6 weeks           | no         | no                    | ALCL             | <500 U/l  | yes                   | no                   | no       | 1 lesion          |
| 12      | 15.27   | 60-79%         | female | /                      | 2 weeks           | no         | no                    | DLBCL            | <500 U/l  | yes                   | no                   | no       | 1 lesion          |
| 13      | 8.90    | ≥80%           | male   | /                      | 1 day             | no         | no                    | ALCL             | unknown   | yes                   | no                   | no       | 1 lesion          |
| 14      | 17.33   | ≥80%           | female | /                      | 28 weeks          | no         | no                    | ALCL             | ≥500 U/l  | yes                   | no                   | no       | 1 lesion          |
| 15      | 3.15    | unknown        | female | BCP-LBL                | unknown           | unknown    | unknown               | DLBCL            | unknown   | yes                   | no                   | unknown  | ≥2 lesions        |
| 16      | 12.55   | ≥80%           | female | /                      | 2 weeks           | yes        | yes                   | ALCL             | <500 U/l  | yes                   | yes                  | unknown  | ≥2 lesions        |
| 17      | 14.05   | ≥80%           | male   | /                      | 10 weeks          | no         | no                    | DLBCL            | <500 U/l  | yes                   | yes                  | no       | ≥2 lesions        |
| 18      | 13.99   | ≥80%           | female | /                      | 4 weeks           | no         | yes                   | DLBCL            | <500 U/l  | yes                   | no                   | no       | 1 lesion          |
| 19      | 14.22   | 60-79%         | male   | /                      | 2 months          | no         | no                    | DLBCL            | unknown   | yes                   | no                   | no       | unknown           |
| 20      | 7.21    | ≥80%           | female | /                      | 1 day             | unknown    | yes                   | DLBCL            | unknown   | yes                   | no                   | no       | 1 lesion          |
| 21      | 12.79   | unknown        | female | /                      | unknown           | no         | no                    | ALCL             | <500 U/l  | yes                   | unknown              | no       | unknown           |
| 22      | 12.50   | ≥80%           | male   | /                      | 1,4 weeks         | no         | no                    | DLBCL            | <500 U/l  | yes                   | no                   | no       | 1 lesion          |
| 23      | 14.79   | unknown        | female | SLE                    | 8 weeks           | no         | no                    | DLBCL            | unknown   | yes                   | no                   | no       | 1 lesion          |
| 24      | 9.04    | unknown        | male   | /                      | 12 weeks          | no         | no                    | DLBCL            | unknown   | yes                   | no                   | no       | 1 lesion          |
| 25      | 7.85    | 20-39%         | female | HIV infection          | 12 weeks          | no         | yes                   | Burkitt lymphoma | ≥500 U/l  | yes                   | no                   | no       | ≥2 lesions        |
| 26      | 16.50   | unknown        | male   | /                      | 6,4 weeks         | no         | yes                   | Burkitt lymphoma | <500 U/l  | yes                   | no                   | no       | 1 lesion          |
| 27      | 16.82   | ≥80%           | male   | /                      | 12,9 weeks        | no         | yes                   | DLBCL            | <500 U/l  | yes                   | no                   | no       | 1 lesion          |
| 28      | 8.76    | unknown        | female | /                      | unknown           | unknown    | no                    | mature B-NHL NOS | <500 U/l  | yes                   | no                   | no       | 1 lesion          |
| 29      | 16.07   | unknown        | male   | /                      | unknown           | unknown    | no                    | Burkitt lymphoma | <500 U/l  | yes                   | no                   | no       | ≥2 lesions        |
| 30      | 12.76   | 40-59%         | female | /                      | unknown           | no         | yes                   | ALCL             | <500 U/l  | yes                   | no                   | no       | unknown           |
| 31      | 10.26   | unknown        | female | kidney transplantation | 3 weeks           | no         | no                    | DLBCL            | unknown   | yes                   | no                   | no       | 1 lesion          |
| 32      | 17.30   | 40-59%         | male   | JMML and allo-SCT      | 4 weeks           | no         | yes                   | DLBCL            | <500 U/l  | yes                   | no                   | no       | ≥2 lesions        |
| 33      | 1.56    | 60-79%         | female | PID n. f. sp.          | 2 weeks           | unknown    | yes                   | DLBCL            | <500 U/l  | yes                   | no                   | no       | ≥2 lesions        |
| 34      | 7.60    | 20-39%         | male   | /                      | 10 weeks          | unknown    | yes                   | ALCL             | <500 U/l  | no                    | no                   | yes      | /                 |
| 35      | 6.92    | 60-79%         | male   | /                      | 2 weeks           | no         | yes                   | PTCL             | unknown   | yes                   | no                   | no       | 1 lesion          |
| 36      | 15.19   | 20-39%         | female | /                      | 15 weeks          | no         | yes                   | mature B-NHL NOS | <500 U/l  | yes                   | no                   | no       | ≥2 lesions        |
| 37      | 15.30   | 40-59%         | male   | /                      | 8 weeks           | no         | yes                   | Burkitt lymphoma | <500 U/l  | yes                   | no                   | no       | ≥2 lesions        |

|    |       |                |        |                        |           |         |         |                  |          |     |     |     |            |
|----|-------|----------------|--------|------------------------|-----------|---------|---------|------------------|----------|-----|-----|-----|------------|
| 38 | 7.78  | <20%           | male   | /                      | 20 weeks  | no      | no      | ALCL             | <500 U/l | yes | no  | no  | ≥2 lesions |
| 39 | 12.58 | 60-79%         | female | /                      | 4 weeks   | no      | no      | ALCL             | <500 U/l | yes | no  | no  | 1 lesion   |
| 40 | 17.86 | 40-59%         | male   | /                      | 12 weeks  | no      | yes     | ALCL             | <500 U/l | yes | no  | no  | ≥2 lesions |
| 41 | 13.96 | ≥80%           | male   | /                      | 2 weeks   | no      | no      | mature B-NHL NOS | <500 U/l | yes | no  | no  | 1 lesion   |
| 42 | 14.16 | 20-39%         | male   | /                      | 12 weeks  | no      | yes     | DLBCL            | <500 U/l | yes | no  | no  | ≥2 lesions |
| 43 | 9.57  | 40-59%         | male   | heart transplantation  | 3 weeks   | no      | no      | DLBCL            | <500 U/l | yes | no  | no  | 1 lesion   |
| 44 | 1.25  | 40-59%         | female | CVID                   | 7 weeks   | no      | yes     | ALCL             | <500 U/l | yes | no  | no  | ≥2 lesions |
| 45 | 14.25 | 40-59%         | male   | /                      | 12 weeks  | no      | no      | DLBCL            | <500 U/l | no  | yes | no  | 1 lesion   |
| 46 | 10.78 | 40-59%         | male   | /                      | 6 weeks   | yes     | no      | DLBCL            | <500 U/l | yes | no  | no  | ≥2 lesions |
| 47 | 17.80 | 20-39%         | female | colitis ulcerosa       | 2 weeks   | no      | no      | DLBCL            | <500 U/l | yes | no  | no  | ≥2 lesions |
| 48 | 15.26 | <20%           | male   | /                      | 20 weeks  | yes     | yes     | DLBCL            | <500 U/l | yes | no  | no  | ≥2 lesions |
| 49 | 10.13 | 40-59%         | female | /                      | 3 weeks   | yes     | yes     | mature B-NHL NOS | <500 U/l | yes | no  | no  | 1 lesion   |
| 50 | 11.50 | 60-79%         | female | /                      | 2 weeks   | no      | yes     | DLBCL            | <500 U/l | yes | no  | no  | 1 lesion   |
| 51 | 11.07 | unknown        | male   | /                      | 3 weeks   | no      | no      | DLBCL            | <500 U/l | yes | no  | no  | ≥2 lesions |
| 52 | 11.41 | unknown        | female | /                      | unknown   | yes     | no      | BCP-LBL          | <500 U/l | yes | no  | no  | 1 lesion   |
| 53 | 8.11  | 40-59%         | male   | /                      | 36 weeks  | no      | yes     | BCP-LBL          | <500 U/l | no  | no  | yes | /          |
| 54 | 9.63  | ≥80%           | male   | /                      | 3 weeks   | no      | no      | ALCL             | unknown  | yes | no  | no  | unknown    |
| 55 | 17.32 | 20-39%         | male   | /                      | 68 weeks  | yes     | yes     | ALCL             | <500 U/l | yes | yes | no  | ≥2 lesions |
| 56 | 9.69  | 20-39%         | female | /                      | 24 weeks  | yes     | yes     | Burkitt lymphoma | <500 U/l | no  | yes | no  | ≥2 lesions |
| 57 | 14.50 | 40-59%         | male   | /                      | 16 weeks  | no      | no      | DLBCL            | <500 U/l | yes | no  | no  | 1 lesion   |
| 58 | 11.33 | ≥80%           | male   | /                      | 2,7 weeks | no      | no      | DLBCL            | <500 U/l | yes | no  | no  | 1 lesion   |
| 59 | 4.63  | 60-79%         | male   | /                      | 12 weeks  | no      | no      | Burkitt lymphoma | <500 U/l | yes | no  | no  | 1 lesion   |
| 60 | 4.25  | 40-59%         | male   | /                      | 2,9 weeks | no      | no      | Burkitt lymphoma | <500 U/l | yes | yes | no  | ≥2 lesions |
| 61 | 12.55 | ≥80%           | female | /                      | 40 weeks  | no      | no      | DLBCL            | <500 U/l | yes | no  | no  | 1 lesion   |
| 62 | 16.66 | 40-59%         | male   | /                      | 16 weeks  | no      | yes     | DLBCL            | <500 U/l | yes | no  | no  | 1 lesion   |
| 63 | 14.38 | unknown        | female | /                      | 16 weeks  | no      | yes     | EN MZL           | <500 U/l | yes | no  | no  | ≥2 lesions |
| 64 | 13.06 | ≥80%           | male   | /                      | 44 weeks  | no      | no      | ALCL             | ≥500 U/l | yes | no  | no  | 1 lesion   |
| 65 | 17.07 | 40-59%         | male   | /                      | 8 weeks   | yes     | yes     | DLBCL            | ≥500 U/l | yes | no  | no  | 1 lesion   |
| 66 | 9.14  | 20-39%         | male   | /                      | 2 weeks   | no      | yes     | ALCL             | ≥500 U/l | yes | no  | no  | ≥2 lesions |
| 67 | 11.07 | ≥80%           | male   | /                      | 1 week    | no      | yes     | DLBCL            | <500 U/l | yes | no  | no  | 1 lesion   |
| 68 | 9.75  | unknown        | male   | /                      | 5 weeks   | no      | yes     | BCP-LBL          | unknown  | yes | no  | no  | 1 lesion   |
| 69 | 15.79 | 20-39%         | male   | CLIPPERS               | 11 weeks  | no      | no      | DLBCL            | <500 U/l | yes | no  | no  | ≥2 lesions |
| 70 | 5.50  | 40-59%         | male   | liver transplantation  | 16 weeks  | no      | no      | DLBCL            | <500 U/l | yes | no  | no  | ≥2 lesions |
| 71 | 4.01  | unknown        | female | PID n. f. sp.          | 0,6 weeks | no      | no      | DLBCL            | ≥500 U/l | yes | no  | no  | ≥2 lesions |
| 72 | 11.48 | 40-59%         | male   | /                      | 2 weeks   | unknown | unknown | mature B-NHL NOS | unknown  | yes | no  | no  | ≥2 lesions |
| 73 | 14.00 | 60-79%         | female | Factor VIII deficiency | 8 weeks   | no      | no      | ALCL             | unknown  | yes | no  | no  | ≥2 lesions |
| 74 | 12.00 | ≥80%           | male   | /                      | 8 weeks   | no      | no      | PTCL             | <500 U/l | yes | no  | no  | ≥2 lesions |
| 75 | 18.00 | not applicable | female | /                      | 0,4 weeks | no      | no      | BCP-LBL          | <500 U/l | no  | no  | yes | /          |

**Abbreviations:** No., number; y, years; BCP-LBL, B-cell precursor lymphoblastic lymphoma; SLE, systemic lupus erythematosus; HIV, human immunodeficiency virus; JMML, juvenile myelomonocytic leukemia; allo-SCT, allogeneic stem cell transplantation; PID n. f. sp., primary immunodeficiency not further specified; CVID, common variable immunodeficiency; CLIPPERS, chronic lymphocytic inflammation with pontine perivascular enhancement responsive to steroids; DLBCL, diffuse large B-cell lymphoma; ALCL, anaplastic large cell lymphoma; B-NHL NOS, B-cell non-Hodgkin's lymphoma not otherwise specified; PTCL, peripheral T-cell lymphoma; EN MZL, extra-nodal marginal zone lymphoma; LDH, lactate dehydrogenase; CSF, cerebrospinal fluid.

## Supplemental Table 2: Therapy details of the 75 PCNSL study patients

| Pt. No. | Therapy components                 | Type of therapy       | MTX in mg/m2/cycle | ARA-C in mg/m2/cycle | Anthracyclines and cumulative dose in mg/m2 | Alkylating agents and cumulative dose in mg/m2/cycle | ith. therapies | RT  |
|---------|------------------------------------|-----------------------|--------------------|----------------------|---------------------------------------------|------------------------------------------------------|----------------|-----|
| 1       | Chemo + RT                         | miscellaneous therapy | 5000               | no ARA-C             | no anthracyclines                           | cyclophosphamide, 400                                | yes            | yes |
| 2       | Chemo only                         | miscellaneous therapy | 3500               | 8000                 | no anthracyclines                           | no alkylating agents                                 | yes            | no  |
| 3       | Chemo + RT                         | miscellaneous therapy | 8000               | no ARA-C             | no anthracyclines                           | no alkylating agents                                 | yes            | yes |
| 4       | Chemo + Rituximab                  | miscellaneous therapy | no MTX             | no ARA-C             | doxorubicin, 50                             | cyclophosphamide, 400 - 1000                         | yes            | no  |
| 5       | Chemo + RT                         | miscellaneous therapy | 1000               | no ARA-C             | doxorubicin, 100                            | cyclophosphamide, 1000                               | yes            | yes |
| 6       | Chemo only                         | pediatric NHL therapy | 8000               | 12000                | doxorubicin, 180                            | cyclophosphamide, 300 - 1000 - 1500 - 3000           | yes            | no  |
| 7       | Chemo only                         | pediatric NHL therapy | 5000 + 8000        | no ARA-C             | daunorubicin, 120 + doxorubicin, 120        | cyclophosphamide, 1000 - 1500 - 3000                 | yes            | no  |
| 8       | Chemo only                         | pediatric NHL therapy | 8000               | 12000                | doxorubicin, 180                            | cyclophosphamide, 300 - 1000 - 1500 - 3000           | yes            | no  |
| 9       | Chemo only                         | miscellaneous therapy | 8000               | 3000                 | unknown                                     | no alkylating agents                                 | yes            | no  |
| 10      | Chemo + Rituximab                  | pediatric NHL therapy | 5000               | 12000                | doxorubicin, 100                            | cyclophosphamide, 400 - 1000 + ifosphamide, 4000     | yes            | no  |
| 11      | no therapy due to logistic reasons | /                     | no MTX             | no ARA-C             | no anthracyclines                           | no alkylating agents                                 | no             | no  |
| 12      | Chemo only                         | pediatric NHL therapy | 8000               | 12000                | doxorubicin, 240                            | cyclophosphamide, 300 - 1000 - 1500 - 3000           | yes            | no  |
| 13      | Chemo + RT                         | pediatric NHL therapy | 8000               | 12000                | doxorubicin, 240                            | cyclophosphamide, 300 - 1000 - 1500 - 3000           | yes            | yes |
| 14      | Chemo + RT                         | pediatric NHL therapy | 8000               | 12000                | doxorubicin, 240                            | cyclophosphamide, 300 - 1000 - 1500 - 3000           | yes            | yes |
| 15      | Chemo + RT                         | pediatric NHL therapy | 8000               | 12000                | doxorubicin, 60                             | yes, but drug and dose not reported                  | yes            | yes |
| 16      | Chemo + RT                         | pediatric NHL therapy | 8000               | 12000                | doxorubicin, 240                            | cyclophosphamide, 300 - 1000 - 1500 - 3000           | yes            | yes |
| 17      | Chemo + Rituximab                  | pediatric NHL therapy | 8000               | 12000                | doxorubicin, 240                            | cyclophosphamide, 300 - 1000 - 1500 - 3000           | yes            | no  |
| 18      | Chemo only                         | pediatric NHL therapy | 8000               | 12000                | doxorubicin, 240                            | cyclophosphamide, 300 - 1000 - 1500 - 3000           | yes            | no  |
| 19      | Chemo only                         | pediatric NHL therapy | 8000               | 12000                | doxorubicin, 240                            | cyclophosphamide, 300 - 1000 - 1500 - 3000           | yes            | no  |
| 20      | Chemo + RT                         | pediatric NHL therapy | 8000               | 12000                | doxorubicin, 240                            | cyclophosphamide, 300 - 1000 - 1500 - 3000           | yes            | yes |
| 21      | Chemo + RT                         | pediatric NHL therapy | 5000               | 12000                | doxorubicin, 100                            | cyclophosphamide, 400 - 1000 + ifosphamide, 4000     | yes            | yes |
| 22      | Chemo only                         | pediatric NHL therapy | 8000               | 12000                | doxorubicin, 180                            | cyclophosphamide, 300 - 1000 - 1500 - 3000           | yes            | no  |
| 23      | Chemo + RT                         | miscellaneous therapy | no MTX             | no ARA-C             | no anthracyclines                           | no alkylating agents                                 | no             | yes |
| 24      | Chemo only                         | pediatric NHL therapy | 8000               | 12000                | doxorubicin, 240                            | cyclophosphamide, 300 - 1000 - 1500 - 3000           | yes            | no  |
| 25      | Chemo + Rituximab                  | miscellaneous therapy | 5000 + 6000 + 8000 | no ARA-C             | no anthracyclines                           | no alkylating agents                                 | yes            | no  |
| 26      | Chemo only                         | pediatric NHL therapy | 5000               | 12000                | daunorubicin, 100                           | cyclophosphamide, 400 - 1000 + ifosphamide, 8000     | yes            | no  |
| 27      | Chemo only                         | pediatric NHL therapy | 5000               | 12000                | daunorubicin, 100                           | cyclophosphamide, 400 - 1000 + ifosphamide, 8000     | yes            | no  |
| 28      | Chemo only                         | pediatric NHL therapy | 5000               | 6000                 | doxorubicin, 240                            | cyclophosphamide, 450 - 1500 -2000                   | yes            | no  |
| 29      | Chemo only                         | pediatric NHL therapy | 5000               | 6000                 | doxorubicin, 240                            | cyclophosphamide, 450 - 1500 -2000                   | yes            | no  |
| 30      | Chemo only                         | pediatric NHL therapy | 5000               | no ARA-C             | doxorubicin, 100                            | cyclophosphamide, 400 - 1000; ifosphamide, 4000      | yes            | no  |
| 31      | Chemo + Rituximab                  | miscellaneous therapy | 8000               | no ARA-C             | no anthracyclines                           | cyclophosphamide, 2400                               | yes            | no  |
| 32      | Chemo + Rituximab                  | pediatric NHL therapy | 8000               | 12000                | doxorubicin, 180                            | cyclophosphamide, 300 - 1000 - 1500 - 3000           | yes            | no  |
| 33      | no therapy - palliation            | miscellaneous therapy | no MTX             | no ARA-C             | no anthracyclines                           | no alkylating agents                                 | unknown        | no  |
| 34      | Chemo + RT                         | pediatric NHL therapy | 5000               | 12000                | doxorubicin, 100                            | cyclophosphamide, 400 - 1000 + ifosphamide, 4000     | yes            | yes |
| 35      | no chemo - wait-and-see            | pediatric NHL therapy | no MTX             | no ARA-C             | no anthracyclines                           | no alkylating agents                                 | no             | no  |
| 36      | Chemo only                         | pediatric NHL therapy | 5000               | 12000                | doxorubicin, 100                            | cyclophosphamide, 400 - 1000 + ifosphamide, 4000     | yes            | no  |
| 37      | Chemo only                         | pediatric NHL therapy | 5000               | 12000                | doxorubicin, 100                            | cyclophosphamide, 400 - 1000 + ifosphamide, 4000     | yes            | no  |

|    |                        |                       |             |          |                                      |                                                                |         |     |
|----|------------------------|-----------------------|-------------|----------|--------------------------------------|----------------------------------------------------------------|---------|-----|
| 38 | Chemo + RT             | pediatric NHL therapy | 5000        | 12000    | doxorubicin, 100                     | cyclophosphamide, 400 - 1000 + ifosphamide, 4000               | yes     | yes |
| 39 | Chemo + RT             | pediatric NHL therapy | 5000        | 12000    | doxorubicin, 100                     | cyclophosphamide, 400 - 1000 + ifosphamide, 4000               | yes     | yes |
| 40 | Chemo + RT             | pediatric NHL therapy | 5000        | 12000    | doxorubicin, 100                     | cyclophosphamide, 400 - 1000 + Ifosphamide, 4000               | yes     | yes |
| 41 | Chemo only             | pediatric NHL therapy | 5000        | 12000    | doxorubicin, 100                     | cyclophosphamide, 400 - 1000 + ifosphamide, 4000               | yes     | no  |
| 42 | Chemo only             | pediatric NHL therapy | 5000        | 12000    | doxorubicin, 100                     | cyclophosphamide, 400 - 1000 + ifosphamide, 4000               | yes     | no  |
| 43 | Chemo only             | pediatric NHL therapy | 2500        | 6000     | doxorubicin, 50                      | cyclophosphamide, 400 - 1000 + ifosphamide, 4000               | yes     | no  |
| 44 | Chemo + RT             | pediatric NHL therapy | 5000        | 12000    | doxorubicin, 100                     | cyclophosphamide, 400 - 1000 + ifosphamide, 4000               | yes     | yes |
| 45 | Chemo only             | pediatric NHL therapy | 5000        | 12000    | doxorubicin, 100                     | cyclophosphamide, 400 - 1000 + ifosphamide, 4000               | yes     | no  |
| 46 | Chemo only             | pediatric NHL therapy | 5000        | 12000    | doxorubicin, 100                     | cyclophosphamide, 400 - 1000 + ifosphamide, 4000               | yes     | no  |
| 47 | Chemo only             | pediatric NHL therapy | 5000        | 12000    | doxorubicin, 100                     | cyclophosphamide, 400 - 1000 + ifosphamide, 4000               | yes     | no  |
| 48 | Chemo + Rituximab      | pediatric NHL therapy | 5000        | 12000    | doxorubicin, 100                     | cyclophosphamide, 400 - 1000 + ifosphamide, 4000               | yes     | no  |
| 49 | Chemo only             | pediatric NHL therapy | 5000        | 12000    | doxorubicin, 100                     | cyclophosphamide, 400 - 1000 + ifosphamide, 4000               | yes     | no  |
| 50 | Chemo only             | pediatric NHL therapy | 5000        | 12000    | doxorubicin, 100                     | cyclophosphamide, 400 - 1000 + ifosphamide, 4000               | yes     | no  |
| 51 | Chemo only             | pediatric NHL therapy | 5000        | 12000    | doxorubicin, 100                     | cyclophosphamide, 400 - 1000 + ifosphamide, 4000               | yes     | no  |
| 52 | Chemo + RT             | pediatric NHL therapy | 5000        | no ARA-C | daunorubicin, 120 + doxorubicin, 120 | cyclophosphamide, 1000 - 1000 - 1000                           | yes     | yes |
| 53 | Chemo only             | pediatric NHL therapy | 5000        | 4000     | daunorubicin, 150 + doxorubicin, 120 | cyclophosphamide, 1000 - 1000 - 1000 - 1000                    | yes     | no  |
| 54 | Chemo + RT             | pediatric NHL therapy | 8000        | 12000    | doxorubicin, 180                     | cyclophosphamide, 300 - 1000 - 1500 - 3000                     | yes     | yes |
| 55 | Chemo + RT             | pediatric NHL therapy | 5000        | 6000     | doxorubicin, 100                     | cyclophosphamide, 400 - 1000 + ifosphamide, 4000               | yes     | yes |
| 56 | Chemo + Rituximab      | pediatric NHL therapy | 5000        | 6000     | doxorubicin, 100                     | cyclophosphamide, 400 - 1000 + ifosphamide, 4000               | yes     | no  |
| 57 | Chemo + Rituximab      | pediatric NHL therapy | 5000        | 6000     | doxorubicin, 100                     | cyclophosphamide, 1000 + ifosphamide, 4000 + ifosphamide, 9000 | yes     | no  |
| 58 | Chemo + Rituximab      | pediatric NHL therapy | unknown     | unknown  | unknown                              | unknown                                                        | yes     | no  |
| 59 | Chemo + Rituximab      | pediatric NHL therapy | 5000        | 6000     | doxorubicin, 100                     | cyclophosphamide, 400 - 1000 + ifosphamide, 4000               | yes     | no  |
| 60 | Chemo + Rituximab      | pediatric NHL therapy | 5000        | 6000     | doxorubicin, 100                     | cyclophosphamide, 1000 + ifosphamide, 4000 + ifosphamide, 9000 | yes     | no  |
| 61 | Chemo + Rituximab      | pediatric NHL therapy | 5000        | 6000     | doxorubicin, 100                     | cyclophosphamide, 400 - 1000 + ifosphamide, 4000               | yes     | no  |
| 62 | Chemo + RT + Rituximab | miscellaneous therapy | 5000        | 12000    | doxorubicin, 100                     | cyclophosphamide, 400 - 1000 + ifosphamide, 4000               | yes     | yes |
| 63 | Chemo + RT             | miscellaneous therapy | no MTX      | no ARA-C | no anthracyclines                    | no alkylating agents                                           | yes     | yes |
| 64 | Chemo only             | pediatric NHL therapy | 8000        | 12500    | doxorubicin, 240                     | cyclophosphamide, 300 - 1500 - 3000 - 1000 - 1000              | yes     | no  |
| 65 | Chemo + Rituximab      | pediatric NHL therapy | 8000        | 12000    | doxorubicin, 180                     | cyclophosphamide, 300 - 1000 - 1500 - 3000                     | yes     | no  |
| 66 | Chemo + RT             | pediatric NHL therapy | 5000        | 12000    | doxorubicin, 100                     | cyclophosphamide, 400 - 1000 + ifosphamide, 4000               | yes     | yes |
| 67 | Chemo + Rituximab      | pediatric NHL therapy | 8000        | 12000    | doxorubicin, 180                     | cyclophosphamide, 300 - 1000 - 1500 - 3000                     | yes     | no  |
| 68 | Chemo + RT             | pediatric NHL therapy | 5000        | no ARA-C | daunorubicin, 120 + doxorubicin, 120 | cyclophosphamide, 1000                                         | yes     | yes |
| 69 | Chemo + RT + Rituximab | miscellaneous therapy | 3500        | no ARA-C | no anthracyclines                    | cyclophosphamide, 300                                          | yes     | yes |
| 70 | Chemo only             | miscellaneous therapy | 1000 + 5000 | no ARA-C | no anthracyclines                    | no alkylating agents                                           | yes     | no  |
| 71 | Chemo + RT             | miscellaneous therapy | 1000        | no ARA-C | doxorubicin, 25                      | cyclophosphamide, 1000                                         | yes     | yes |
| 72 | Chemo only             | pediatric NHL therapy | 8000        | 12000    | doxorubicin, 180                     | cyclophosphamide, 300 - 1000 - 1500 - 3000                     | unknown | no  |
| 73 | Chemo + RT             | miscellaneous therapy | 5000        | 6000     | no anthracyclines                    | procarbazine                                                   | yes     | yes |
| 74 | Chemo only             | adult NHL therapy     | 8000        | 1600     | no anthracyclines                    | temozolomide                                                   | no      | no  |
| 75 | Chemo + RT             | pediatric NHL therapy | 5000        | no ARA-C | daunorubicin, 100 + doxorubicin, 100 | cyclophosphamide, 1000 - 1000 - 1000                           | yes     | yes |

**Abbreviations:** No., number; Chemo, chemotherapy; RT, radiotherapy; NHL, non-Hodgkin's lymphoma; MTX, methotrexate; ARA-C, cytarabine; ith., intrathecal; RT, radiotherapy.

**Supplemental Table 3: Disease outcome, long-term side effects and follow-up of the 75 PCNSL study patients**

| Pt. No. | Relapse/progression | Death | Cause of Death            | Neurological long-term toxicity                                                           | Cardiac long-term toxicity | Endocrine long-term toxicity | Other late effects | Follow-up (y) |
|---------|---------------------|-------|---------------------------|-------------------------------------------------------------------------------------------|----------------------------|------------------------------|--------------------|---------------|
| 1       | no                  | no    | /                         | no                                                                                        | no                         | no                           | no                 | 1.65          |
| 2       | no                  | no    | /                         | no                                                                                        | no                         | no                           | no                 | 2.99          |
| 3       | yes                 | no    | /                         | no                                                                                        | no                         | no                           | osteonecrosis      | 15.03         |
| 4       | no                  | yes   | TRM (septicemia)          | no                                                                                        | no                         | no                           | no                 | /             |
| 5       | no                  | no    | /                         | no                                                                                        | no                         | no                           | no                 | 17.98         |
| 6       | no                  | no    | /                         | no                                                                                        | no                         | partial hypopituitarism      | no                 | 8.98          |
| 7       | yes                 | yes   | relapse                   | no                                                                                        | no                         | no                           | no                 | /             |
| 8       | no                  | no    | /                         | no                                                                                        | no                         | no                           | no                 | 2.36          |
| 9       | no                  | no    | /                         | no                                                                                        | no                         | no                           | osteonecrosis      | 0.90          |
| 10      | no                  | no    | /                         | no                                                                                        | no                         | no                           | no                 | 0.92          |
| 11      | yes                 | no    | /                         | no                                                                                        | no                         | no                           | no                 | 0.96          |
| 12      | no                  | no    | /                         | no                                                                                        | unknown                    | no                           | no                 | 5.14          |
| 13      | no                  | no    | /                         | no                                                                                        | unknown                    | no                           | no                 | 6.56          |
| 14      | no                  | no    | /                         | cognitive impairment                                                                      | unknown                    | unknown                      | unknown            | 19.31         |
| 15      | no                  | no    | /                         | unknown                                                                                   | unknown                    | unknown                      | unknown            | 25.59         |
| 16      | yes                 | yes   | relapse                   | unknown                                                                                   | unknown                    | unknown                      | unknown            | /             |
| 17      | no                  | no    | /                         | no                                                                                        | unknown                    | no                           | no                 | 8.42          |
| 18      | no                  | no    | /                         | no                                                                                        | no                         | no                           | no                 | 11.61         |
| 19      | yes                 | yes   | relapse                   | no                                                                                        | unknown                    | no                           | no                 | /             |
| 20      | no                  | no    | /                         | unknown                                                                                   | unknown                    | unknown                      | unknown            | 15.44         |
| 21      | no                  | no    | /                         | unknown                                                                                   | no                         | no                           | no                 | 7.58          |
| 22      | no                  | no    | /                         | speech and movement difficulties                                                          | no                         | no                           | no                 | 0.93          |
| 23      | no                  | yes   | unknown                   | transverse myelitis causing paraplegia and neurogenic bladder (SLE or PCNSL?)             | unknown                    | no                           | no                 | /             |
| 24      | no                  | no    | /                         | right hemiplegia, epilepsy                                                                | no                         | no                           | no                 | 18.19         |
| 25      | no                  | no    | /                         | no                                                                                        | no                         | no                           | no                 | 0.49          |
| 26      | no                  | no    | /                         | no                                                                                        | no                         | no                           | no                 | 6.75          |
| 27      | no                  | no    | /                         | left hand tremor                                                                          | no                         | no                           | no                 | 5.22          |
| 28      | no                  | no    | /                         | unknown                                                                                   | unknown                    | unknown                      | unknown            | 7.04          |
| 29      | no                  | no    | /                         | unknown                                                                                   | unknown                    | unknown                      | unknown            | 7.11          |
| 30      | yes                 | no    | /                         | unknown                                                                                   | no                         | unknown                      | unknown            | 4.58          |
| 31      | no                  | no    | /                         | epilepsy                                                                                  | no                         | no                           | no                 | 12.70         |
| 32      | yes                 | no    | /                         | left arm paresis, club foot and epilepsy                                                  | no                         | no                           | no                 | 3.21          |
| 33      | no                  | yes   | PCNSL without any therapy | no                                                                                        | no                         | no                           | no                 | /             |
| 34      | yes                 | yes   | relapse                   | optic nerve atrophy on both sides                                                         | no                         | no                           | no                 | /             |
| 35      | no                  | no    | /                         | no                                                                                        | no                         | no                           | no                 | 11.52         |
| 36      | no                  | no    | /                         | balance and sensory disturbances, facial nerve paresis, bladder/bowel evacuation disorder | no                         | no                           | no                 | 7.45          |
| 37      | no                  | no    | /                         | diplopia                                                                                  | no                         | panhypopituitarism           | osteonecrosis      | 8.40          |
| 38      | no                  | no    | /                         | complete amaurosis of the left eye, epilepsy                                              | no                         | no                           | no                 | 15.45         |



|    |     |     |                                 |                                                     |    |                       |                             |      |
|----|-----|-----|---------------------------------|-----------------------------------------------------|----|-----------------------|-----------------------------|------|
| 39 | no  | no  | /                               | no                                                  | no | no                    | 6.79                        |      |
| 40 | no  | no  | /                               | no                                                  | no | no                    | 7.65                        |      |
| 41 | no  | no  | /                               | no                                                  | no | no                    | 12.05                       |      |
| 42 | no  | no  | /                               | hearing loss, optic nerve atrophy on the right side | no | no                    | 9.88                        |      |
| 43 | no  | yes | TRM (heart graft failure)       | no                                                  | no | no                    | /                           |      |
| 44 | no  | yes | TRM (pneumonia)                 | left hemiparesis                                    | no | no                    | /                           |      |
| 45 | no  | no  | /                               | N. peroneus palsy                                   | no | no                    | 10.49                       |      |
| 46 | no  | no  | /                               | no                                                  | no | psychosocial problems | 4.83                        |      |
| 47 | no  | yes | TRM (not specified)             | no                                                  | no | no                    | /                           |      |
| 48 | yes | yes | relapse                         | no                                                  | no | no                    | /                           |      |
| 49 | no  | no  | /                               | vincristine neuropathy                              | no | no                    | 7.96                        |      |
| 50 | no  | no  | /                               | no                                                  | no | no                    | 2.60                        |      |
| 51 | no  | no  | /                               | no                                                  | no | panhypopituitarism    | 3.53                        |      |
| 52 | no  | no  | /                               | no                                                  | no | osteonecrosis         | 5.62                        |      |
| 53 | no  | no  | /                               | massive visual deficit on the left side             | no | no                    | 0.19                        |      |
| 54 | yes | yes | relapse / neurological disorder | no                                                  | no | no                    | /                           |      |
| 55 | no  | no  | /                               | no                                                  | no | no                    | 1.92                        |      |
| 56 | no  | no  | /                               | no                                                  | no | no                    | 0.87                        |      |
| 57 | no  | no  | /                               | photophobia, chronic headaches, polyneuropathy      | no | no                    | 4.96                        |      |
| 58 | no  | no  | /                               | no                                                  | no | no                    | 0.87                        |      |
| 59 | no  | no  | /                               | no                                                  | no | no                    | 2.27                        |      |
| 60 | no  | no  | /                               | no                                                  | no | no                    | 1.52                        |      |
| 61 | no  | no  | /                               | no                                                  | no | no                    | 0.68                        |      |
| 62 | yes | no  | /                               | no                                                  | no | no                    | 7.50                        |      |
| 63 | yes | no  | /                               | diminished cognitive function                       | no | no                    | 10.41                       |      |
| 64 | no  | no  | /                               | epilepsy                                            | no | no                    | 6.83                        |      |
| 65 | no  | no  | /                               | no                                                  | no | no                    | 0.85                        |      |
| 66 | yes | no  | /                               | no                                                  | no | no                    | 1.84                        |      |
| 67 | no  | no  | /                               | facial nerve palsy                                  | no | no                    | 0.99                        |      |
| 68 | no  | no  | /                               | no                                                  | no | no                    | 9.00                        |      |
| 69 | no  | no  | /                               | no                                                  | no | no                    | 0.69                        |      |
| 70 | no  | no  | /                               | no                                                  | no | no                    | 2.16                        |      |
| 71 | no  | no  | /                               | bilateral hearing loss                              | no | no                    | CMV retinitis, chronic GvHD | 2.41 |
| 72 | no  | no  | /                               | no                                                  | no | no                    | 4.14                        |      |
| 73 | no  | no  | /                               | no                                                  | no | no                    | 9.02                        |      |
| 74 | no  | no  | /                               | epilepsy                                            | no | no                    | 5.01                        |      |
| 75 | yes | no  | /                               | no                                                  | no | no                    | 3.39                        |      |

**Abbreviations:** No., number; TRM, treatment-related mortality; PCNSL, primary central nervous system lymphoma; CMV, cytomegalovirus; GvHD, graft-versus-host disease; y, years.

**Supplemental Table 4A: Univariate analysis for event-free survival**

| Variables                          | Estimate | Std Err | ChiSq  | p-value       | Hazard Ratio | HR Lower CL | HR Upper CL |
|------------------------------------|----------|---------|--------|---------------|--------------|-------------|-------------|
| Pre-existing disease: no vs. yes   | -0.974   | 0.470   | 4.302  | <b>0.027</b>  | 0.377        | 0.150       | 0.948       |
| HD-MTX used: yes vs. no            | -1.707   | 0.520   | 10.756 | <b>0.0002</b> | 0.181        | 0.065       | 0.503       |
| HD-ARA-C used: yes vs. no          | -1.077   | 0.451   | 5.712  | <b>0.012</b>  | 0.341        | 0.141       | 0.824       |
| Alkylators used: yes vs. no        | -1.034   | 0.519   | 3.971  | <b>0.033</b>  | 0.356        | 0.129       | 0.983       |
| Anthracyclines used: yes vs. no    | -0.415   | 0.518   | 0.643  | 0.423         | 0.660        | 0.239       | 1.821       |
| Intrathecal therapies: yes vs. no  | -0.652   | 0.750   | 0.755  | 0.385         | 0.521        | 0.120       | 2.267       |
| Rituximab used: yes vs. no         | 0.112    | 0.565   | 0.039  | 0.843         | 1.118        | 0.370       | 3.382       |
| Radiotherapy: yes vs. no           | 0.540    | 0.448   | 1.452  | 0.228         | 1.716        | 0.713       | 4.127       |
| Chemo + RT vs. chemo alone         | 0.820    | 0.559   | 2.156  | 0.142         | 2.271        | 0.760       | 6.788       |
| Ritux. + chemo vs. chemo alone     | 0.704    | 0.677   | 1.082  | 0.298         | 2.021        | 0.537       | 7.610       |
| Other therapy* vs. chemo alone     | 1.888    | 0.842   | 5.021  | 0.025         | 6.604        | 1.267       | 34.425      |
| Age group: ≥15 vs. <15 years       | 0.416    | 0.490   | 0.722  | 0.396         | 1.516        | 0.581       | 3.956       |
| Lansky 20-39% vs. <20%             | -0.834   | 0.872   | 0.915  | 0.339         | 0.434        | 0.079       | 2.398       |
| Lansky 40-59% vs. <20%             | -1.098   | 0.822   | 1.786  | 0.181         | 0.334        | 0.067       | 1.669       |
| Lansky 60-79% vs. <20%             | -1.921   | 1.003   | 3.665  | 0.056         | 0.146        | 0.020       | 1.047       |
| Lansky ≥80% vs. <20%               | -2.410   | 1.004   | 5.763  | <b>0.003</b>  | 0.090        | 0.013       | 0.643       |
| Gender: female vs. male            | 0.094    | 0.457   | 0.042  | 0.837         | 1.098        | 0.449       | 2.689       |
| B-symptoms: yes vs. no             | -0.210   | 0.753   | 0.078  | 0.781         | 0.811        | 0.186       | 3.544       |
| ALCL vs. DLBCL                     | 0.511    | 0.495   | 1.067  | 0.302         | 1.667        | 0.632       | 4.398       |
| Burkitt's lymphoma vs. DLBCL       | -0.794   | 1.050   | 0.571  | 0.450         | 0.452        | 0.058       | 3.540       |
| Mature B-NHL NOS vs. DLBCL         | NA       | NA      | NA     | NA            | NA           | NA          | NA          |
| Other NHL vs. DLBCL                | 0.058    | 0.775   | 0.006  | 0.940         | 1.060        | 0.232       | 4.842       |
| Number of lesions: ≥2 vs. 1        | 0.913    | 0.548   | 2.776  | 0.085         | 2.493        | 0.851       | 7.300       |
| Pediatric NHL protocol: yes vs. no | -0.784   | 0.470   | 2.783  | 0.095         | 0.457        | 0.182       | 1.147       |

**Abbreviations:** Std Err, standard error; ChiSq, Chi square test; HR, hazard ratio; CL, confidence limit; HD-MTX, high-dose-methotrexate; HD-ARA-C, high-dose-cytarabine; Chemo, chemotherapy; RT, radiotherapy. Ritux., rituximab; ALCL, anaplastic large cell lymphoma; DLBCL, diffuse large B-cell lymphoma; NOS, not otherwise specified; NHL, non-Hodgkin's lymphoma; NA, not applicable.

\* n=3 (no initial therapy due to logistic reasons, n=1; without any initial therapy, n=1; wait-and-see strategy after total resection, n=1)

**Supplemental Table 4B: Univariate analysis for overall survival**

| Variables                          | Estimate | Std Err | ChiSq | p-value      | Hazard Ratio | HR Lower CL | HR Upper CL |
|------------------------------------|----------|---------|-------|--------------|--------------|-------------|-------------|
| Pre-existing disease: no vs. yes   | -1.683   | 0.581   | 8.403 | <b>0.001</b> | 0.186        | 0.060       | 0.580       |
| HD-MTX used: yes vs. no            | -1.411   | 0.674   | 4.386 | <b>0.023</b> | 0.244        | 0.065       | 0.913       |
| HD-ARA-C used: yes vs. no          | -0.427   | 0.615   | 0.482 | 0.488        | 0.653        | 0.196       | 2.177       |
| Alkylators used: yes vs. no        | -0.276   | 0.777   | 0.126 | 0.723        | 0.759        | 0.165       | 3.480       |
| Anthracyclines used: yes vs. no    | 0.246    | 0.777   | 0.100 | 0.752        | 1.278        | 0.279       | 5.861       |
| Intrathecal therapies: yes vs. no  | -0.388   | 1.051   | 0.136 | 0.712        | 0.679        | 0.087       | 5.322       |
| Rituximab used: yes vs. no         | -0.058   | 0.781   | 0.006 | 0.941        | 0.944        | 0.204       | 4.365       |
| Radiotherapy: yes vs. no           | 0.074    | 0.588   | 0.016 | 0.900        | 1.077        | 0.340       | 3.408       |
| Chemo + RT vs. chemo alone         | 0.348    | 0.673   | 0.267 | 0.605        | 1.416        | 0.379       | 5.291       |
| Ritux. + chemo vs. chemo alone     | 0.224    | 0.872   | 0.066 | 0.797        | 1.251        | 0.227       | 6.906       |
| Other therapy* vs. chemo alone     | 1.156    | 1.124   | 1.057 | 0.304        | 3.177        | 0.351       | 28.764      |
| Age group: ≥15 vs. <15 years       | -0.462   | 0.776   | 0.354 | 0.552        | 0.630        | 0.138       | 2.884       |
| Lansky 20-39% vs. <20%             | -1.152   | 1.010   | 1.301 | 0.254        | 0.316        | 0.044       | 2.288       |
| Lansky 40-59% vs. <20%             | -1.502   | 0.915   | 2.692 | 0.101        | 0.223        | 0.037       | 1.339       |
| Lansky 60-79% vs. <20%             | -1.550   | 1.001   | 2.396 | 0.122        | 0.212        | 0.030       | 1.511       |
| Lansky ≥80% vs. <20%               | -2.033   | 1.003   | 4.109 | <b>0.018</b> | 0.131        | 0.018       | 0.935       |
| Gender: female vs. male            | 0.159    | 0.586   | 0.073 | 0.787        | 1.172        | 0.372       | 3.696       |
| B-symptoms: yes vs. no             | 0.569    | 0.797   | 0.509 | 0.476        | 1.766        | 0.370       | 8.425       |
| ALCL vs. DLBCL                     | 0.330    | 0.633   | 0.271 | 0.602        | 1.391        | 0.402       | 4.808       |
| Burkitt's lymphoma vs. DLBCL       | -0.286   | 1.073   | 0.071 | 0.790        | 0.751        | 0.092       | 6.158       |
| Mature B-NHL NOS vs. DLBCL         | NA       | NA      | NA    | NA           | NA           | NA          | NA          |
| Other NHL vs. DLBCL                | NA       | NA      | NA    | NA           | NA           | NA          | NA          |
| Number of lesions: ≥2 vs. 1        | 1.487    | 0.802   | 3.433 | <b>0.043</b> | 4.423        | 0.918       | 21.319      |
| Pediatric NHL protocol: yes vs. no | 0.384    | 0.776   | 0.245 | 0.621        | 1.468        | 0.321       | 6.712       |

**Abbreviations:** Std Err, standard error; ChiSq, Chi square test; HR, hazard ratio; CL, confidence limit; HD-MTX, high-dose-methotrexate; HD-ARA-C, high-dose-cytarabine; Chemo, chemotherapy; RT, radiotherapy. Ritux., rituximab; ALCL, anaplastic large cell lymphoma; DLBCL, diffuse large B-cell lymphoma; NOS, not otherwise specified; NHL, non-Hodgkin's lymphoma; NA, not applicable.

\* n=3 (no initial therapy due to logistic reasons, n=1; without any initial therapy, n=1; wait-and-see strategy after total resection, n=1)

### **Multivariate analyses for event-free and overall survival**

In multivariate analyses, only usage of high-dose methotrexate retained significance for event-free survival (hazard ratio: 0.195, 95% confidence limits: 0.070–0.540, p-value: 0.002) and only pre-existing disorders (hazard ratio: 0.172, 95% confidence limits: 0.041–0.716, p-value: 0.016) for overall survival.
